# Supplementary material for: Needlestick Injuries among Surgeons in Training
Source: Atypon-hosted journal article supplement (doi:10.1056/nejmoa070378), 2007-06-27
Supplement: nejm_makary_2693sa1.pdf [file nejm_makary_2693sa1.pdf]

## Supplementary Appendix

This appendix has been provided by the authors to give readers additional information about their work.

Supplement to: Makary MA, Al-Attar A, Holzmueller CG, et al. Needlestick injuries among surgeons in training. *N Engl J Med* 2007;356:2693-9.

1. PGY equivalent: 1 2 3 4 5 Sex: M / F
2. How many needle sticks have you sustained as an intern? \_\_\_\_\_  
 as a resident? \_\_\_\_\_  
 as a medical student? \_\_\_\_\_
3. Have you ever had a needle stick involving a “high-risk” patient? Y / N  
 (“high-risk” defined as history of HIV, hepatitis B or C, or IV drug use)
4. Was your most recent needle stick involving a “high-risk” patient? Y / N
5. Was your most recent needle stick? (*circle one*): Self-induced / By someone else  
 (*circle one*): With a hollow-bore needle / Solid needle  
 (*circle one*): In the OR / At the bedside / Other \_\_\_\_\_  
 (*circle one*): While passing a needle / “Loading” a needle / Suturing / Recapping a needle / Cleaning-up / Other: \_\_\_\_\_
- A. In your opinion, what was the cause of your recent needle stick? (*circle all that apply*):
- Lack of assistance
  - Lack of skill set required
  - Fatigue
  - Rushed
  - Could not have been prevented
- B. Was your most recent needle stick reported to employee health? Y / N
- If NOT, what was the reason? (*circle all that apply*):
- It takes too much time
  - There is no utility in reporting it
  - The associated stigmata of having performed a technical error
  - I didn’t want to know the result
  - Other:
- C. Did anyone else know about your needle stick? Y / N
- If YES, was it? (*circle all that apply*):
- A resident
  - An attending
  - A nurse
  - A medical student
  - A significant other
  - Other:
6. Which blood-born pathogen do you fear the most? Hep B / Hep C / HIV  
the least? Hep B / Hep C / HIV
